# Supplementary material for: Sources and oxidative potential of water-soluble humic-like substances (HULIS WS ) in fine particulate matter (PM 2.5 ) in Beijing
Source: Copernicus journal article supplement (doi:10.5194/acp-18-5607-2018), 2018-04-24
Supplement: Supplementary file [file acp-18-5607-2018-supplement.pdf]

Supplement of Atmos. Chem. Phys., 18, 5607–5617, 2018  
<https://doi.org/10.5194/acp-18-5607-2018-supplement>  
© Author(s) 2018. This work is distributed under  
the Creative Commons Attribution 4.0 License.

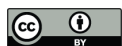

*Supplement of*

## **Sources and oxidative potential of water-soluble humic-like substances (HULIS<sub>WS</sub>) in fine particulate matter (PM<sub>2.5</sub>) in Beijing**

**Yiqiu Ma et al.**

*Correspondence to:* Xinghua Qiu (xhqiu@pku.edu.cn) and Di Hu (dihu@hkbu.edu.hk)

The copyright of individual parts of the supplement might differ from the CC BY 4.0 License.

## **Content of this file**

Section S1. HPLC-ELSD analysis of HULIS<sub>WS</sub> mass concentration

Section S2. GC-MS analysis of individual HULIS<sub>WS</sub> species

Section S3. Positive Matrix Factorization (PMF) analysis

Section S4. Calculation of particle-phase liquid water content (LWC<sub>p</sub>) and particle acidity (H<sub>p</sub><sup>+</sup>)

Table S1. Concentrations of hopanes, levoglucosan, and major aerosol constituents during the heating and non-heating seasons

Table S2. Concentrations of individual HULIS<sub>WS</sub> species during the heating and non-heating seasons

Table S3. Multilinear regression analysis of PMF-resolved HULIS<sub>WS</sub> from vehicle emissions (HULIS<sub>WS\_VE</sub>), particle acidity (H<sub>p</sub><sup>+</sup>), particle-phase liquid water content (LWC<sub>p</sub>), and particle-phase SO<sub>4</sub><sup>2-</sup>, NO<sub>x</sub> and O<sub>3</sub>

Table S4. Multilinear regression analysis of PMF-resolved HULIS<sub>WS</sub> from secondary aerosol formation (HULIS<sub>WS\_SEC</sub>), particle acidity (H<sub>p</sub><sup>+</sup>), particle-phase liquid water content (LWC<sub>p</sub>), and particle-phase SO<sub>4</sub><sup>2-</sup>, NO<sub>x</sub> and O<sub>3</sub>

Figure S1. Comparison of GC-MS peak intensities of HULIS<sub>WS</sub> species eluted by methanol and basic methanol

Figure S2. Comparison of the concentration levels of individual HULIS<sub>WS</sub> species in the heating and non-heating seasons

Figure S3. Relative source intensities of PMF source profiles

Figure S4. PMF-predicted versus measured concentrations of HULIS<sub>WS</sub> mass concentration and extrinsic DTT activity of HULIS<sub>WS</sub>

Figure S5. HULIS<sub>WS</sub> mass concentration versus hopanes and levoglucosan

Figure S5. Temporal variation of gas-phase NO<sub>x</sub> concentration in Beijing during 2012-2013

Figure S6. Temporal variation for gas-phase O<sub>3</sub> concentration in Beijing during 2012-2013

### Section S1. HPLC-ELSD analysis of HULIS<sub>WS</sub> mass concentration.

HULIS<sub>WS</sub> mass concentration was analyzed by a high-performance liquid chromatography system (HPLC, ThermoFisher Scientific, Waltham, MA, USA) coupled with an evaporative light scattering detector (Alltech ELSD 3300, Grace, Houston, TX, USA). Detailed method was provided in Lin et al. (2010) Since there is no requirement for further separation, a polyaryletheretherketone tube (15 m, 0.127 mm i.d., Alltech, Dearfield, IL, USA) instead of the analytical column was used to connect the HPLC injector port and ELSD). HULIS<sub>WS</sub> was eluted by isocratic elution with acetonitrile: distilled deionized water (1:4, vol/vol) at a rate of 0.6 mL min<sup>-1</sup>. The ELSD was operated at a N<sub>2</sub> flow rate of 1.5 L min<sup>-1</sup> and a drift tubing temperature of 90°C. The recoveries of representative HULIS<sub>WS</sub> species were provided in Lin et al. (2010)

### Section S2. GC-MS analysis of individual HULIS<sub>WS</sub> species.

Individual HULIS<sub>WS</sub> species were analyzed using gas chromatography-mass spectrometry (GC-MS; Agilent 7890A-5975C, Santa Clara, CA, USA) in electron ionization (EI) mode. A HP-5MS column (30 m, 250 μm i.d., 0.25 μm film thickness, Agilent, Santa Clara, CA, USA) was used to separate individual species. Two microliter of sample was injected into GC in splitless mode. The GC oven temperature program was set as follows: held at 80°C for 5 min; 3°C min<sup>-1</sup> to 200°C and held for 2 min; 15°C min<sup>-1</sup> to 300°C and held for 15 min. For most compounds with authentic standards, they were identified and quantified by comparison to the standards. For terephthalic acid, 2-hydroxybenzoic acid, and 1,2,3-/1,2,4-benzenetricarboxylic acids, which were lack of authentic standards, isophthalic acid, 3-hydroxybenzoic acid, and 1,3,5-benzenetricarboxylic acid were used as the surrogate compounds for calibration and recovery test, respectively. Similarly, for SOA markers, surrogate compounds with similar functional groups were used for calibration and they were determined following the procedure described in Hu et al. (2008). Recoveries for all measured species were within 72%-106%.

### Section S3. Positive Matrix Factorization (PMF) analysis.

PMF is a widely used receptor model for the source apportionment of fine particulate matter (PM<sub>2.5</sub>). In this model, the original data matrix  $X$  could be divided into a factor contribution matrix  $G$  and a factor profile matrix  $F$ :

$$X = G \times F + \varepsilon$$

$m \times n$      $m \times p$      $p \times n$      $m \times n$

where  $n$  stands for the sample number,  $m$  stands for the species number,  $p$  refers to the number of factors in PMF solution,  $\varepsilon$  refers to a residual matrix.

During calculation, the sum of scaled residual  $Q$  was minimized:

$$Q = \sum_{i=1}^m \sum_{j=1}^n \left( \frac{e_{ij}}{\sigma_{ij}} \right)^2$$

where  $e_{ij}$  is the residual of each sample, and  $\sigma_{ij}$  is the uncertainty of the  $j^{\text{th}}$  species for the sample  $i$ .

In this study, a total of 66 samples and 13 species was included in the final PMF solution. The uncertainty setting was referred to Hu et al. (2010). Briefly, the uncertainties of HULIS<sub>WS</sub> mass concentration, extrinsic DTT activity (DTT<sub>v</sub>), major ions (Mg<sup>2+</sup>, Ca<sup>2+</sup>, NH<sub>4</sub><sup>+</sup>, SO<sub>4</sub><sup>2-</sup>, and nss-Cl<sup>-</sup>), SOA marker (MonoT) and individual HULIS<sub>WS</sub> species (4M5NC, 3M6NC, 123Ben, 124Ben, and TPha) were set as 0.4 of average annual value. Hopane and Levoglucosan (LevoG) were set as 0.2 of average annual value. The optimal PMF solution had five factors with 20% of extra modeling uncertainty.

### Section S3. Calculation of particle-phase liquid water content (LWC<sub>p</sub>) and particle acidity (H<sub>p</sub><sup>+</sup>).

LWC<sub>p</sub> was associated to both organic (LWC<sub>org</sub>) and inorganic components (LWC<sub>inorg</sub>) in PM<sub>2.5</sub>. The LWC<sub>org</sub> was calculated using the following equation:

$$LWC_{org} = \frac{m_{org}\rho_w}{\rho_{org}} \frac{k_{org}}{(1/RH - 1)}$$

where  $m_{org}$  is the concentration of organic matter (OM), and in this paper, 1.98 and 1.50 were adopted for OM/OC ratio in the heating and non-heating seasons, respectively (Xing et al., 2013).  $\rho_w$  and  $\rho_{org}$  are the densities of water and organic, with values of 1 g cm<sup>-3</sup> and 1.4 g cm<sup>-3</sup>, respectively (Guo et al., 2015).  $k_{org}$  is the organic hygroscopicity parameter ( $k_{org}=0.1$ , Wu et al., 2016), and RH is the relative humidity (%).

Particle acidity (H<sub>p</sub><sup>+</sup>) was calculated using the following equation:

$$H_p^+ = \frac{1000H_{air}^+}{LWC_{org} + LWC_{inorg}}$$

where H<sub>p</sub><sup>+</sup> (mol/L) is the concentration of hydronium ion in the aqueous solution, interpreted as particle acidity. H<sub>air</sub><sup>+</sup> and LWC<sub>inorg</sub> were calculated by ISORROPIA- II using inorganic ions (Na<sup>+</sup>, SO<sub>4</sub><sup>2-</sup>, NH<sub>4</sub><sup>+</sup>, Cl<sup>-</sup>, Ca<sup>2+</sup>, K<sup>+</sup>, and Mg<sup>2+</sup>), RH and temperature as the inputs (Fountoukis and Nenes, 2007).

**Table S1. Concentrations of hopanes, levoglucosan, and major aerosol constituents during the heating and non-heating seasons**

| Species                                              | Heating season |        |             | Non-heating season |        |             |
|------------------------------------------------------|----------------|--------|-------------|--------------------|--------|-------------|
|                                                      | Mean           | Median | Range       | Mean               | Median | Range       |
| <i>Hopanes (ng m<sup>-3</sup>)</i>                   |                |        |             |                    |        |             |
| 17 $\alpha$ (H)-22,29,30-trisnorhopane               | 2.75           | 2.92   | 0.46 – 6.45 | 0.41               | 0.31   | 0.15 – 1.10 |
| 17 $\alpha$ (H),21 $\beta$ (H)-30-norhopane          | 7.19           | 6.56   | 0.97 – 17.1 | 1.72               | 1.33   | 0.44 – 4.95 |
| 17 $\alpha$ (H),21 $\beta$ (H)-hopane                | 3.51           | 3.34   | 0.85 – 7.64 | 1.81               | 1.51   | 0.53 – 5.83 |
| 17 $\alpha$ (H),21 $\beta$ (H)-22R-homohopane        | 0.63           | 0.55   | 0.16 – 1.96 | 0.46               | 0.38   | 0.16 – 1.23 |
| 17 $\alpha$ (H),21 $\beta$ (H)-22S-homohopane        | 2.94           | 2.89   | 0.65 – 6.16 | 1.34               | 1.14   | 0.36 – 3.57 |
| Hopanes (SUM)                                        | 17.0           | 16.6   | 3.20 – 37.7 | 5.74               | 4.91   | 1.73 – 16.7 |
| <i>Major Ions (<math>\mu</math>g m<sup>-3</sup>)</i> |                |        |             |                    |        |             |
| Sodium                                               | 0.55           | 0.55   | 0.08 – 1.69 | 0.27               | 0.22   | 0.05 – 0.72 |
| Ammonium                                             | 8.84           | 5.87   | 0.88 – 34.7 | 5.02               | 2.93   | 0.28 – 22.8 |
| Sulfate                                              | 14.7           | 7.52   | 2.14 – 59.9 | 10.5               | 7.24   | 0.65 – 38.6 |
| Chloride                                             | 3.81           | 2.97   | 0.47 – 16.1 | 0.82               | 0.77   | 0.05 – 2.85 |
| <i>Other species</i>                                 |                |        |             |                    |        |             |
| Levoglucosan (ng m <sup>-3</sup> )                   | 310            | 251    | 22.8 – 1188 | 114                | 86.3   | 19.5 – 555  |
| OC ( $\mu$ g m <sup>-3</sup> )                       | 19.1           | 18.3   | 4.87 – 40.9 | 9.77               | 8.96   | 3.33 – 29.1 |
| EC( $\mu$ g m <sup>-3</sup> )                        | 2.61           | 2.32   | 0.43 – 5.50 | 1.53               | 1.32   | 0.33 – 3.50 |

**Table S2. Concentrations of individual HULIS<sub>WS</sub> species during the heating and non-heating seasons**

| Concentration<br>(ng m <sup>-3</sup> )       | Heating season |        |             | Non-heating season |        |             |
|----------------------------------------------|----------------|--------|-------------|--------------------|--------|-------------|
|                                              | Mean           | Median | Range       | Mean               | Median | Range       |
| <i>Individual HULIS<sub>WS</sub> species</i> |                |        |             |                    |        |             |
| adipic acid                                  | 6.59           | 3.50   | 0.91 – 25.5 | 5.28               | 4.40   | 2.01 – 17.7 |
| pimelic acid                                 | 2.94           | 1.77   | 0.41 -9.57  | 2.50               | 2.21   | 0.86 – 11.5 |
| vanillic acid                                | 5.88           | 6.32   | 0.47 – 12.9 | 1.28               | 0.60   | n.d. – 10.6 |
| azelaic acid                                 | 13.7           | 10.3   | 1.14 – 35.5 | 14.9               | 13.9   | 3.86 – 55.2 |
| syringic acid                                | 7.04           | 4.59   | 0.38 – 16.5 | 2.08               | 1.04   | 0.29 – 16.0 |
| 2-hydroxybenzoic acid                        | 6.70           | 5.40   | 0.71 – 22.4 | 1.00               | 0.69   | n.d. – 3.26 |
| 3-hydroxybenzoic acid                        | 6.03           | 4.96   | 0.54 – 21.1 | 1.03               | 0.76   | n.d. – 6.97 |
| 4-hydroxybenzoic acid                        | 19.3           | 13.7   | 0.99 – 57.6 | 4.39               | 1.74   | 0.47 – 63.3 |
| phthalic acid                                | 54.4           | 25.0   | 6.55 – 424  | 22.0               | 23.8   | 6.88 – 69.4 |
| isophthalic acid                             | 4.77           | 3.29   | 0.64 – 17.8 | 2.87               | 2.30   | 1.06 – 14.9 |
| terephthalic acid                            | 150            | 97.7   | 17.0 – 411  | 98.1               | 79.6   | 7.30 – 372  |
| 4-nitrophenol                                | 35.1           | 27.7   | 1.49 – 105  | 2.86               | 1.56   | 0.45 – 14.5 |
| 4-nitrocatechol                              | 27.1           | 20.6   | 0.62 – 103  | 2.91               | 1.54   | 0.50 – 28.1 |
| 2-hydroxy-5-nitrobenzoic acid                | 8.50           | 8.60   | 0.33 – 23.8 | 6.38               | 8.12   | 0.72 – 15.8 |
| 2-methyl-4-nitrophenol                       | 27.2           | 24.8   | 1.47 – 56.9 | 1.91               | 0.85   | 0.32 – 9.68 |
| 4-methyl-5-nitrocatechol                     | 7.38           | 7.94   | 0.26 – 17.6 | 0.51               | n.d.   | n.d. – 8.70 |
| 3-methyl-6-nitrocatechol                     | 18.6           | 16.6   | 0.51 – 54.5 | 2.25               | 1.47   | n.d. – 13.7 |
| 1,2,3-benzenetricarboxylic acid              | 27.3           | 12.6   | 2.24 – 168  | 16.2               | 13.2   | n.d. – 65.2 |
| 1,2,4-benzenetricarboxylic acid              | 22.7           | 11.9   | 1.98 – 114  | 13.7               | 11.5   | 4.09 – 43.3 |
| 1,3,5-benzenetricarboxylic acid              | 5.95           | 0.98   | 0.23 – 134  | 1.35               | 0.93   | 0.26 – 4.94 |
| ΣHULIS <sub>WS</sub> -quantified             | 458            | 368    | 39.62– 1657 | 203                | 178    | 41.9 – 782  |

---

| <i>SOA tracers</i>                      |      |      |              |      |      |              |
|-----------------------------------------|------|------|--------------|------|------|--------------|
| 3-hydroxyglutaric acid                  | 3.66 | 3.50 | 0.36 – 9.77  | 1.81 | 1.84 | 0.71 – 4.85  |
| 3-acetylpentanedioic acid               | 2.47 | 1.71 | n.d. – 8.40  | 4.44 | 3.83 | 1.16 – 10.33 |
| 3-hydroxy-4,4-dimethylglutaric acid     | 1.06 | 0.80 | n.d. – 3.01  | 1.16 | 1.04 | 0.37 – 3.11  |
| 3-Isopropylpentanedioic acid            | 4.01 | 3.34 | n.d. – 14.09 | 5.34 | 5.11 | 1.02 – 11.80 |
| 3-methyl-1,2,3-butanetricarboxylic acid | 1.26 | 1.05 | n.d. – 3.30  | 4.09 | 3.15 | 1.09 – 9.80  |

---

n.d.: not detected.

**Table S3. Multilinear regression analysis of PMF-resolved HULIS<sub>WS</sub> from vehicle emissions (HULIS<sub>WS\_VE</sub>), particle acidity (H<sub>p</sub><sup>+</sup>), particle-phase liquid water content (LWC<sub>p</sub>), and particle-phase SO<sub>4</sub><sup>2-</sup>, NO<sub>x</sub> and O<sub>3</sub>**

| Variable                      | $\beta$ -coefficient | Standard error | t value | p value |
|-------------------------------|----------------------|----------------|---------|---------|
| Intercept                     | 0.337                | 0.220          | 1.530   | 0.131   |
| H <sub>p</sub> <sup>+</sup>   | -0.113               | 0.508          | -0.223  | 0.824   |
| LWC <sub>p</sub>              | -0.008               | 0.008          | -0.972  | 0.335   |
| SO <sub>4</sub> <sup>2-</sup> | 0.018                | 0.013          | 1.381   | 0.172   |
| NO <sub>x</sub>               | 0.012                | 0.003          | 4.254   | 0.000   |
| O <sub>3</sub>                | -0.013               | 0.004          | -3.008  | 0.004   |

**Table S4. Multilinear regression analysis of PMF-resolved HULIS<sub>WS</sub> from secondary aerosol formation (HULIS<sub>WS\_SEC</sub>), particle acidity (H<sub>p</sub><sup>+</sup>), particle-phase liquid water content (LWC<sub>p</sub>), and particle-phase SO<sub>4</sub><sup>2-</sup>, NO<sub>x</sub> and O<sub>3</sub>**

| Variable                      | $\beta$ -coefficient | Standard error | t value | p value |
|-------------------------------|----------------------|----------------|---------|---------|
| Intercept                     | -0.031               | 0.357          | -0.088  | 0.930   |
| H <sub>p</sub> <sup>+</sup>   | 1.291                | 0.822          | 1.571   | 0.121   |
| LWC <sub>p</sub>              | 0.026                | 0.013          | 1.997   | 0.050   |
| SO <sub>4</sub> <sup>2-</sup> | 0.066                | 0.021          | 3.227   | 0.002   |
| NO <sub>x</sub>               | -0.001               | 0.005          | -0.267  | 0.790   |
| O <sub>3</sub>                | 0.028                | 0.007          | 3.942   | 0.000   |

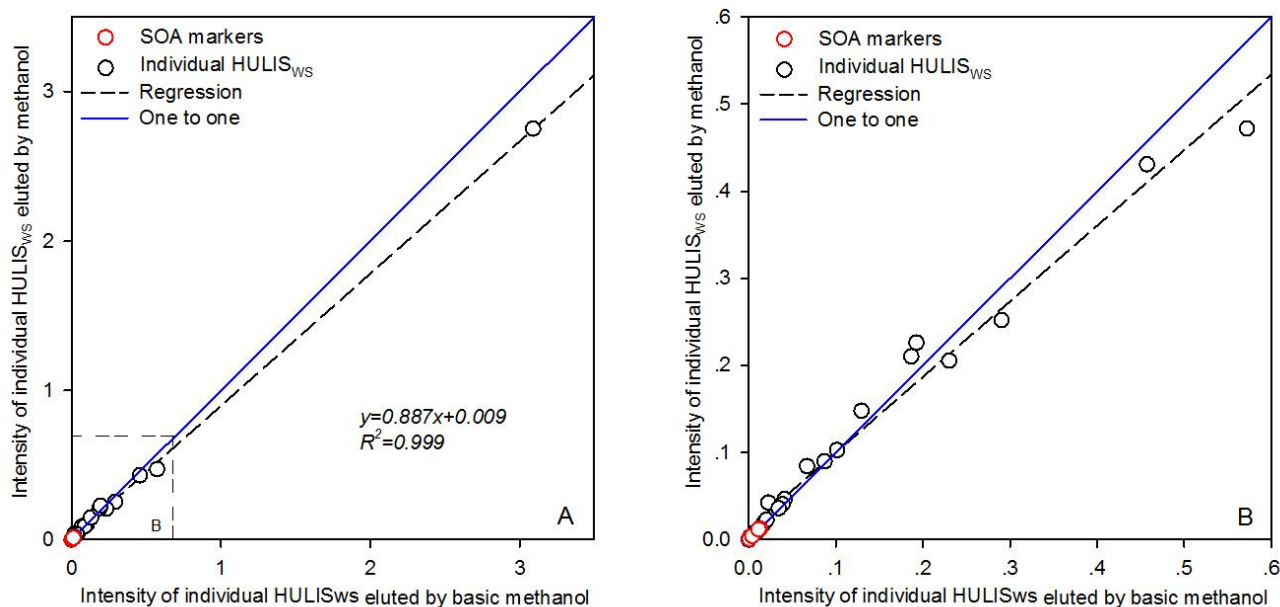

**Figure S1. Comparison of GC-MS peak intensities of HULIS<sub>WS</sub> species eluted by methanol and basic methanol (panel B is the magnification of panel A with the intensity below 0.6)**



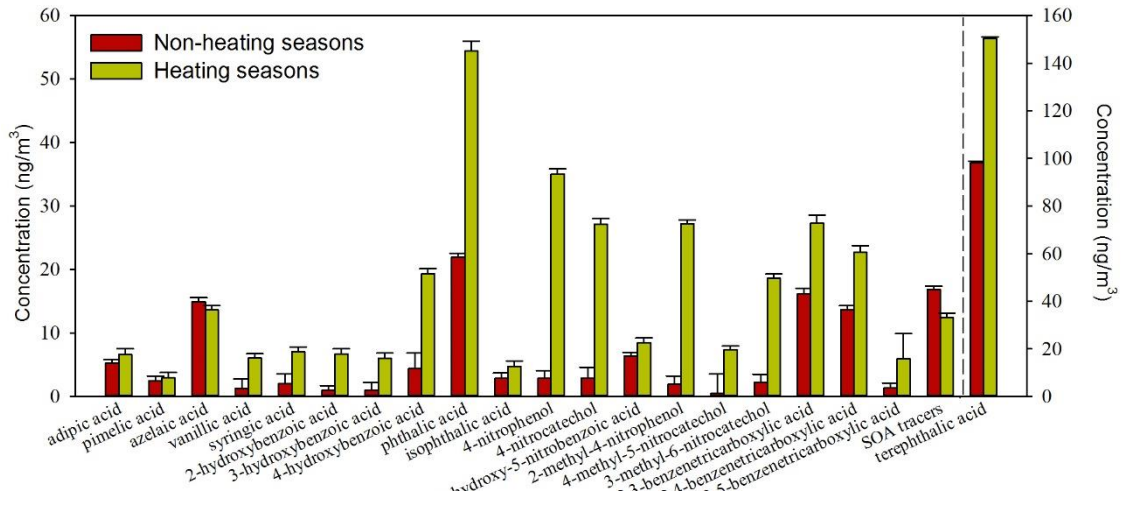

Figure S2. Comparison of concentration levels of individual HULIS<sub>ws</sub> species in the heating and non-heating seasons.

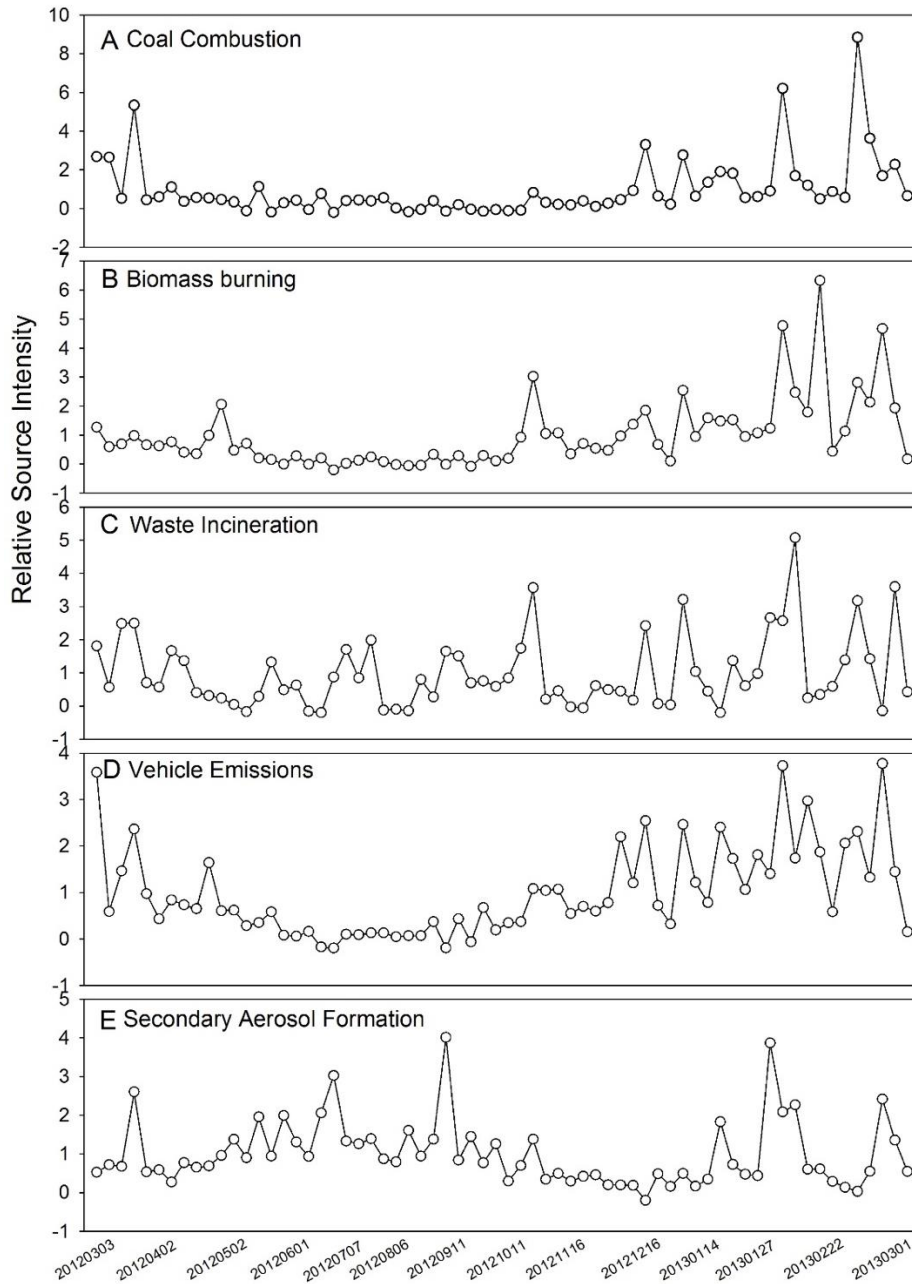

Figure S3. Relative source intensities of PMF source profiles.

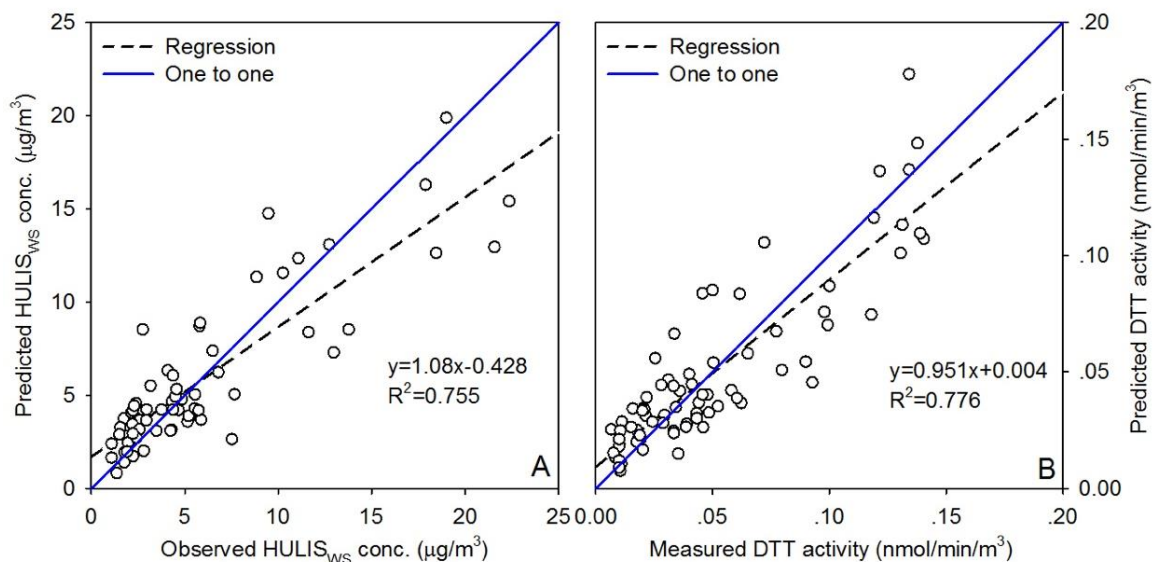

**Figure S4. PMF-predicted versus measured concentrations of HULIS<sub>ws</sub> mass concentration (panel A) and extrinsic DTT activity of HULIS<sub>ws</sub> (panel B).**

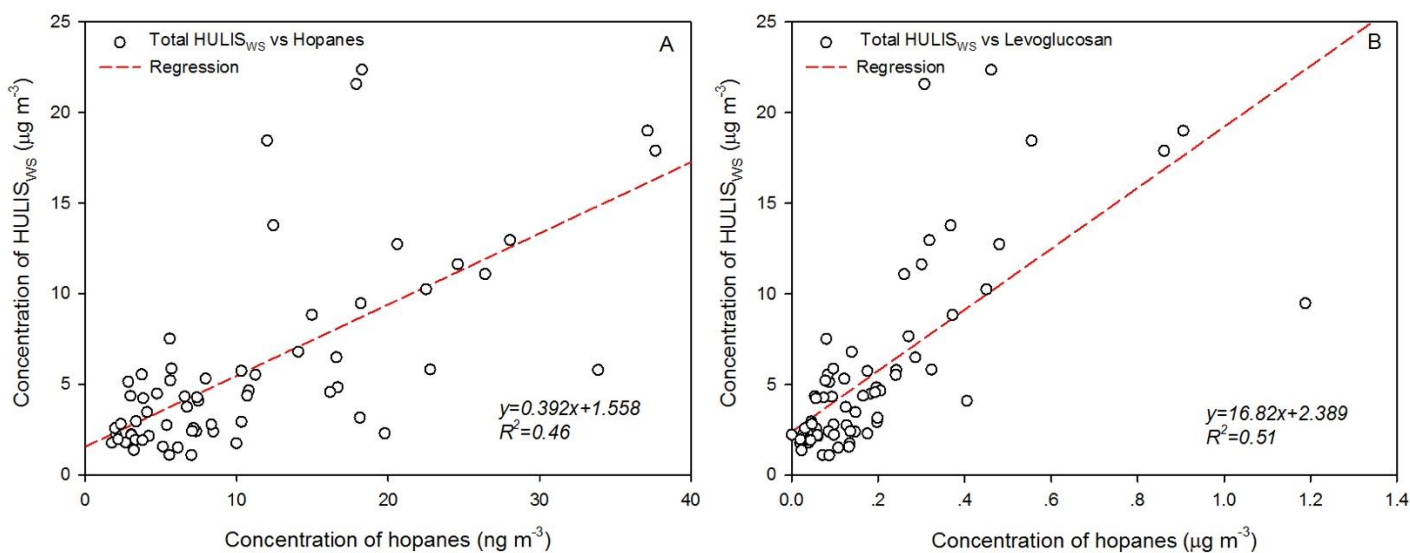

**Figure S5. HULIS<sub>ws</sub> mass concentration versus hopanes (panel A) and levoglucosan (panel B)**

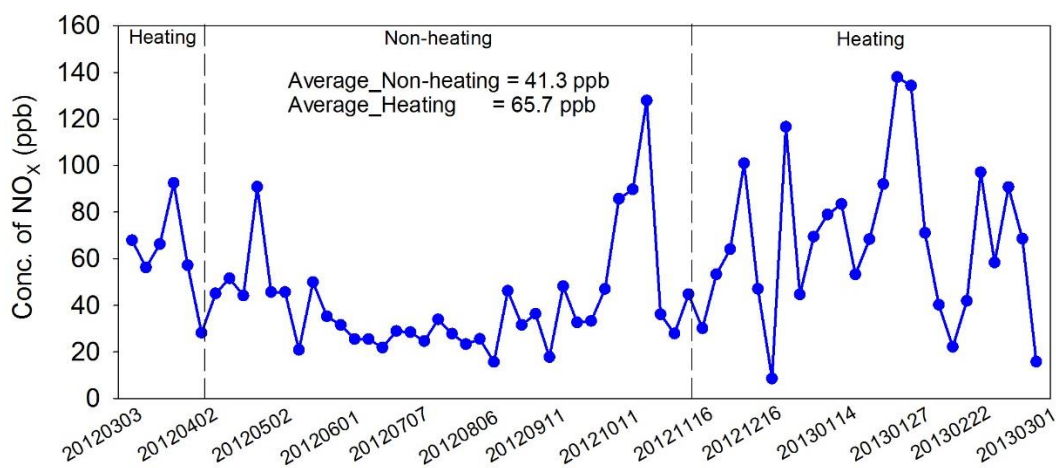

**Figure S6. Temporal variation for gas-phase NO<sub>x</sub> concentration in Beijing during 2012-2013.**

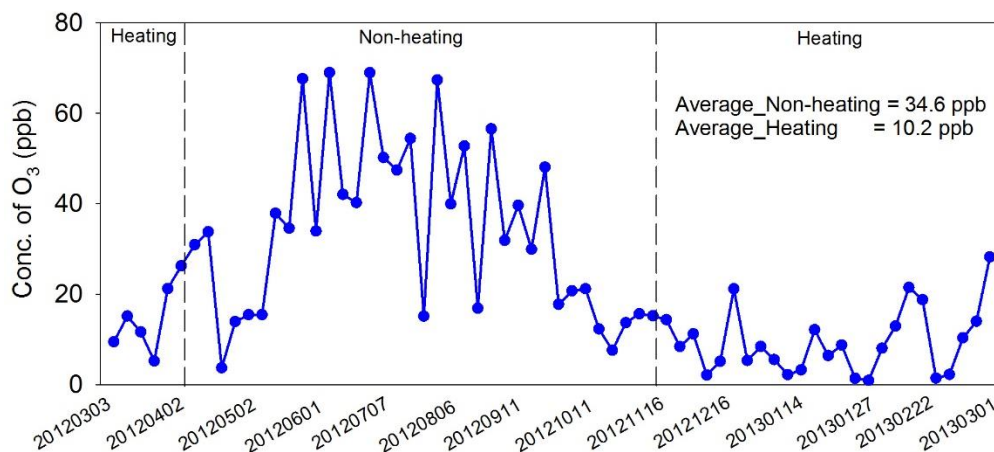

**Figure S7. Temporal variation for gas-phase O<sub>3</sub> concentration in Beijing during 2012-2013.**

### References:

- Fountoukis, C. and Nenes, A.: ISORROPIA II: a computationally efficient thermodynamic equilibrium model for K–H<sub>2</sub>O aerosols, *Atmos. Chem. Phys.*, 7, 4639–4659, 2007.
- Guo, H., Xu, L., Bougiatioti, A., Cerully, K. M., Capps, S. L., Hite, J. R., Carlton, A. G., Lee, S. H., Bergin, M. H., Ng, N. L., Nenes, A. and Weber, R. J.: Fine-particle water and pH in the southeastern United States, *Atmos. Chem. Phys.*, 15(9), 5211–5228, 2015.
- Hu, D., Bian, Q., Li, T. W. Y., Lau, A. K. H. and Yu, J. Z.: Contributions of isoprene, monoterpenes,  $\beta$ -caryophyllene, and toluene to secondary organic aerosols in Hong Kong during the summer of 2006, *J. Geophys. Res. Atmos.*, 113(22), D22206, 2008.
- Hu, D., Bian, Q., Lau, A. K. H. and Yu, J. Z.: Source apportioning of primary and secondary organic carbon in summer PM<sub>2.5</sub> in Hong Kong using positive matrix factorization of secondary and primary organic tracer data, *J. Geophys. Res. Atmos.*, 115(16), 1–14, 2010.
- Lin, P., Huang, X. F., He, L. Y. and Zhen Yu, J.: Abundance and size distribution of HULIS in ambient aerosols at a rural site in South China, *J. Aerosol Sci.*, 41(1), 74–87, 2010.
- Wu, Z. J., Zheng, J., Shang, D. J., Du, Z. F., Wu, Y. S., Zeng, L. M., Wiedensohler, A. and Hu, M.: Particle hygroscopicity and its link to chemical composition in the urban atmosphere of Beijing, China, during summertime, *Atmos. Chem. Phys.*, 16(2), 1123–1138, 2016.
- Xing, L., Fu, T. M., Cao, J. J., Lee, S. C., Wang, G. H., Ho, K. F., Cheng, M. C., You, C. F. and Wang, T. J.: Seasonal and spatial variability of the OM/OC mass ratios and high regional correlation between oxalic acid and zinc in Chinese urban organic aerosols, *Atmos. Chem. Phys.*, 13(8), 4307–4318, 2013.
